# Supplementary material for: Quantification of Neurological Blood-Based Biomarkers in Critically Ill Patients With Coronavirus Disease 2019
Source: PubMed Central journal article supplement — Crit Care Explor. 2020 Oct 2;2(10):e0238. doi: 10.1097/CCE.0000000000000238 (PMC7535554; doi:10.1097/cce.0000000000000238), 2020-10-02
Supplement: cc9-2-e0238-s002.pdf [file cc9-2-e0238-s002.pdf]

**Supplemental Table 1.** Clinical results from both ICU control and Patients with COVID-19. All Laboratory results are from first day of ICU admission or first day of study enrolment. p-values determined by Mann Whitney U-test

| Laboratory Test                                         | Reporting N<br>Control;COVID | ICU Controls<br>N=19 | COVID<br>N=27    | p-values |
|---------------------------------------------------------|------------------------------|----------------------|------------------|----------|
| <b>Hematology</b>                                       |                              |                      |                  |          |
| WBC count, x10 <sup>9</sup> /L, median [IQR]            | 18;27                        | 10.4 [6.53-18.9]     | 9.60 [6.00-13.3] | 0.41     |
| PMN count, x10 <sup>9</sup> /L, median [IQR]            | 17;27                        | 7.4 [4.0-14]         | 8.1 [4.9-11.8]   | 0.98     |
| Lymphocytes, x10 <sup>9</sup> /L, median [IQR]          | 17;27                        | 1.1 [0.55-1.6]       | 0.60 [0.40-0.80] | 0.030    |
| Hemoglobin, g/L, median [IQR]                           | 18;27                        | 119 [95.0-134]       | 117 [98.0-130]   | 0.86     |
| Platelets, x10 <sup>9</sup> /L, median [IQR]            | 18;27                        | 207 [158-256]        | 213 [136-269]    | 0.99     |
| PTT, s, median [IQR]                                    | 17;24                        | 33 [31-38]           | 36 [32-39]       | 0.45     |
| INR, median [IQR]                                       | 18;23                        | 1.2 [1.0-1.4]        | 1.2 [1.2-1.3]    | 0.57     |
| D-dimer, mg/L, median [IQR]                             | 11;26                        | 2359 [1058-3069]     | 1138 [751-3822]  | 0.32     |
| <b>Inflammation</b>                                     |                              |                      |                  |          |
| Procalcitonin, ng/ml, median [IQR]                      | 4;21                         | 6.8 [0.037-15]       | 0.28 [0.10-0.65] | 0.73     |
| Ferritin, ug/L, median [IQR]                            | 12;27                        | 199 [90.3-488]       | 1287 [800-2932]  | <0.0001  |
| CRP, mg/L, median [IQR]                                 | 8;26                         | 135 [10.5-227]       | 98.3 [67.5-168]  | 0.92     |
| IL-6, pg/ml, median [IQR]                               | 19;25                        | 51.4 [17.2-143]      | 66.3 [25.4-138]  | 0.76     |
| <b>Blood Gases &amp; Pulmonary Function</b>             |                              |                      |                  |          |
| MAP, mmHg, median [IQR]                                 | 11;26                        | 75 [68-85]           | 72 [66-83]       | 0.43     |
| PaO <sub>2</sub> , mmHg, median [IQR]                   | 18;26                        | 95.5 [76.3-114]      | 81.0 [68.0-92.0] | 0.0090   |
| PaCO <sub>2</sub> , mmHg, median [IQR]                  | 18;26                        | 40.0 [35.3-43.3]     | 37.0 [34.8-43.3] | 0.74     |
| FiO <sub>2</sub> , mmHg, median [IQR]                   | 18;27                        | 0.43 [0.35-0.61]     | 0.50 [0.35-0.60] | 0.76     |
| PaO <sub>2</sub> :FiO <sub>2</sub> , mmHg, median, IQR] | 18;27                        | 232 [153-272]        | 163 [136-234]    | 0.039    |
| ETCO <sub>2</sub> , mmHg, median [IQR]                  | 9;10                         | 32.0 [29.5-33.5]     | 33.0 [30.0-37]   | 0.53     |
| PEEP, ml/cmH <sub>2</sub> O, median [IQR]               | 12;13                        | 8 [5-10]             | 10 [8-12]        | 0.27     |
| Minute ventilation, L/min, median [IQR]                 | 11;13                        | 8.6 [8.1-10]         | 10 [8.9-11]      | 0.31     |
| SpO <sub>2</sub> , %, median [IQR]                      | 10;6                         | 0.95 [0.94-0.97]     | 0.96 [0.90-0.97] | >0.99    |
| <b>Electrolytes</b>                                     |                              |                      |                  |          |
| Temp, C°, median [IQR]                                  | 17;26                        | 37.0 [36.8-37.2]     | 37.2 [37.0-38.0] | 0.039    |
| pH, median [IQR]                                        | 18;26                        | 7.4 [7.4-7.4]        | 7.4 [7.3-7.5]    | 0.85     |
| HCO <sub>3</sub> , meq/L, median [IQR]                  | 18;27                        | 25 [22-27]           | 24 [21-25]       | 0.40     |
| Na, mmol/L, median [IQR]                                | 18;27                        | 138 [134-139]        | 137 [132-140]    | 0.55     |
| K, mmol/L, median [IQR]                                 | 18;27                        | 4.0 [3.7-4.5]        | 4.0 [3.6-4.2]    | 0.51     |
| <b>Hepatic &amp; Renal Function</b>                     |                              |                      |                  |          |
| Albumin, g/L, median [IQR]                              | 18;27                        | 27 [24-34]           | 25 [22-31]       | 0.44     |
| Bilirubin, μmol/L, median [IQR]                         | 17;27                        | 10 [7.0-16]          | 11 [7.0-22]      | 0.70     |
| AST, U/L, median [IQR]                                  | 17;27                        | 34 [23-64]           | 82 [41-111]      | 0.0030   |
| ALT, U/L, median [IQR]                                  | 17;27                        | 29 [18-49]           | 84 [30-121]      | 0.0013   |
| LDH, U/L, median [IQR]                                  | 17;27                        | 257 [200-302]        | 398 [286-478]    | 0.0003   |
| Creatinine, μmol/L, median [IQR]                        | 18;27                        | 105 [59.8-145]       | 99.0 [72.0-133]  | 0.84     |
