# Supplementary material for: Quantification of Neurological Blood-Based Biomarkers in Critically Ill Patients With Coronavirus Disease 2019
Source: PubMed Central journal article supplement — Crit Care Explor. 2020 Oct 2;2(10):e0238. doi: 10.1097/CCE.0000000000000238 (PMC7535554; doi:10.1097/cce.0000000000000238), 2020-10-02
Supplement: cc9-2-e0238-s004.pdf [file cc9-2-e0238-s004.pdf]

**Supplemental Table 3. Sex disaggregated concentrations of GFAP, t-tau, UCH-L1, and NF-L for both ICU controls and COVID-19 patients. Comparisons by Mann Whitney U-test.**

| Parameters                         | ICU Controls     |                  |         | COVID            |                  |         |
|------------------------------------|------------------|------------------|---------|------------------|------------------|---------|
|                                    | Males            | Females          | p-value | Males            | Females          | p-value |
| N (%)                              | 9 (47)           | 10 (53)          |         | 18 (67)          | 9 (33)           |         |
| <b>GFAP, pg/ml, median [IQR]</b>   | 81.3 [59.8-130]  | 135 [90.2-212]   | 0.11    | 293 [156-578]    | 215 [99.2-513]   | 0.53    |
| <b>t-tau, pg/ml, median [IQR]</b>  | 2.70 [1.47-4.90] | 3.90 [2.36-5.94] | 0.21    | 1.92 [1.14-3.20] | 1.73 [0.91-2.75] | 0.41    |
| <b>UCH-L1, pg/ml, median [IQR]</b> | 20.1 [11.9-24.2] | 26.8 [16.8-41.9] | 0.18    | 33.5 [16.4-55.7] | 20.6 [13.9-30.2] | 0.15    |
| <b>NF-L, pg/ml, median [IQR]</b>   | 15.7 [4.14-37.3] | 38.2 [27.6-102]  | 0.079   | 50.0 [22.2-104]  | 22.3 [10.3-75.0] | 0.076   |
