# Supplementary material for: Quantification of Neurological Blood-Based Biomarkers in Critically Ill Patients With Coronavirus Disease 2019
Source: PubMed Central journal article supplement — Crit Care Explor. 2020 Oct 2;2(10):e0238. doi: 10.1097/CCE.0000000000000238 (PMC7535554; doi:10.1097/cce.0000000000000238), 2020-10-02
Supplement: cc9-2-e0238-s005.pdf [file cc9-2-e0238-s005.pdf]

**Supplemental Table 4. Age correlations for GFAP, t-tau, UCH-L1, and NF-L in both ICU controls and COVID-19 patients. Correlation by spearman rank correlation.**

| Parameters           | ICU Controls |                |                | COVID      |                  |                |
|----------------------|--------------|----------------|----------------|------------|------------------|----------------|
|                      | 64 [33-75]   |                |                | 70 [54-76] |                  |                |
| Age, y, median [IQR] | <b>rho</b>   | <b>95% CI</b>  | <b>p-value</b> | <b>rho</b> | <b>95% CI</b>    | <b>p-value</b> |
| <b>GFAP, pg/ml</b>   | 0.719        | 0.3815-0.8877  | 0.0005         | 0.633      | 0.3223 to 0.8204 | 0.0004         |
| <b>t-tau, pg/ml</b>  | 0.690        | 0.3312-0.8748  | 0.0011         | 0.0827     | -0.3176 to 0.458 | 0.68           |
| <b>UCH-L1, pg/ml</b> | 0.281        | -0.2124-0.6603 | 0.24           | 0.146      | -0.2588 to 0.507 | 0.47           |
| <b>NF-L, pg/m</b>    | 0.411        | -0.0675-0.7359 | 0.080          | 0.678      | 0.3911 to 0.8446 | 0.0001         |
