# Supplementary material for: Quantification of Neurological Blood-Based Biomarkers in Critically Ill Patients With Coronavirus Disease 2019
Source: PubMed Central journal article supplement — Crit Care Explor. 2020 Oct 2;2(10):e0238. doi: 10.1097/CCE.0000000000000238 (PMC7535554; doi:10.1097/cce.0000000000000238), 2020-10-02
Supplement: cc9-2-e0238-s006.pdf [file cc9-2-e0238-s006.pdf]

**Supplemental Table 5. Pre-existing dementia disaggregated concentrations of GFAP, t-tau, UCH-L1, and NF-L for both ICU controls and COVID-19 patients. Comparisons by Mann Whitney U-test.**

| Parameters                  | ICU Controls     |                  |         | COVID            |                  |         |
|-----------------------------|------------------|------------------|---------|------------------|------------------|---------|
|                             | Yes              | No               | p-value | Yes              | No               | p-value |
| N (%)                       | 2 (11)           | 17 (89)          |         | 5 (19)           | 22 (81)          |         |
| GFAP, pg/ml, median [IQR]   | 409 [359-458]    | 113 [73.2-143.2] | 0.012   | 647 [248-2040]   | 226 [139-435]    | 0.064   |
| t-tau, pg/ml, median [IQR]  | 6.51 [5.86-7.15] | 2.80 [2.17-4.90] | 0.047   | 1.80 [1.20-2.60] | 1.76 [1.13-2.95] | 0.84    |
| UCH-L1, pg/ml, median [IQR] | 22.8 [20.8-24.8] | 20.5 [11.9-36.1] | 0.75    | 25.9 [13.7-38.9] | 25.2 [14.35-105] | 0.79    |
| NF-L, pg/ml, median [IQR]   | 38.7 [35.3-42.1] | 32.4 [9.56-47.1] | 0.49    | 84.2 [57.1-269]  | 30.9 [16.0-72.6] | 0.023   |
