# Supplementary material for: Quantification of Neurological Blood-Based Biomarkers in Critically Ill Patients With Coronavirus Disease 2019
Source: PubMed Central journal article supplement — Crit Care Explor. 2020 Oct 2;2(10):e0238. doi: 10.1097/CCE.0000000000000238 (PMC7535554; doi:10.1097/cce.0000000000000238), 2020-10-02
Supplement: cc9-2-e0238-s007.pdf [file cc9-2-e0238-s007.pdf]

**Supplemental table 6. Demographic and clinical information for delirium dichotomization based off of maximum ICDSC score for both ICU control and COVID-19 groups.** Categorical variables were compared using Fisher's exact, continuous variables were tested using Mann Whitney U within each specific patient group.

| Parameters                            | ICU Controls |            | p-value | COVID-19   |            | p-value |
|---------------------------------------|--------------|------------|---------|------------|------------|---------|
|                                       | <4           | ≥4         |         | <4         | ≥4         |         |
| <b>ICDSC</b>                          |              |            |         |            |            |         |
| <b>Total N</b>                        | 15           | 4          |         | 14         | 11         |         |
| <b>Age, median [IQR]</b>              | 66 [46-75]   | 30 [24-69] | 0.27    | 69 [42-74] | 74 [61-91] | 0.11    |
| <b>Males, N (%)</b>                   | 8 (53)       | 1 (25)     | 0.58    | 7 (14)     | 9 (81)     | 0.25    |
| <b>Dementia, N (%)</b>                | 1 (7)        | 1 (25)     | 0.39    | 0 (0)      | 5 (45)     | 0.0087  |
| <b>Neurological Clinical Symptoms</b> |              |            |         |            |            |         |
| <b>Headache, N (%)</b>                | 1 (8)        | 1 (25)     | 0.41    | 3 (19)     | 4 (36)     | 0.39    |
| <b>Max ICDSC Score, median [IQR]</b>  | 0 [0-2]      | 5 [4-5]    |         | 0 [0-2]    | 6 [5-7]    |         |
| <b>Comorbidities</b>                  |              |            |         |            |            |         |
| <b>Hypertension, N (%)</b>            | 7 (58)       | 1 (33)     | >0.99   | 8 (53)     | 8(73)      | 0.058   |
| <b>Diabetes, N (%)</b>                | 2 (18)       | 1 (33)     | 0.55    | 2 (13)     | 6 (54)     | 0.038   |
| <b>Obesity, N (%)</b>                 | 1 (9)        | 2 (67)     | 0.093   | 0 (0)      | 1 (9)      | >0.99   |
| <b>Dyslipidemia, N (%)</b>            | 3 (23)       | 0 (0)      | 0.54    | 5 (38)     | 4 (44)     | >0.99   |
| <b>CKD, N (%)</b>                     | 2 (15)       | 0 (0)      | >0.99   | 1 (7)      | 3 (27)     | 0.28    |
| <b>CAD, N (%)</b>                     | 1 (20)       | 0 (0)      | >0.99   | 3 (25)     | 2 (22)     | >0.99   |
| <b>COPD, N (%)</b>                    | 2 (16)       | 0 (0)      | >0.99   | 0 (0)      | 1 (9)      | 0.42    |
