# Supplementary material for: Quantification of Neurological Blood-Based Biomarkers in Critically Ill Patients With Coronavirus Disease 2019
Source: PubMed Central journal article supplement — Crit Care Explor. 2020 Oct 2;2(10):e0238. doi: 10.1097/CCE.0000000000000238 (PMC7535554; doi:10.1097/cce.0000000000000238), 2020-10-02
Supplement: cc9-2-e0238-s008.pdf [file cc9-2-e0238-s008.pdf]

**Supplemental Table 7. Correlations of neurological biomarkers and markers of inflammation in COVID-19 patients.** Correlation by spearman rank correlation.

| Laboratory Test | GFAP, pg/ml |                    |         | t-tau, pg/ml |                      |         | UCH-L1, pg/ml |                    |         | NF-L, pg/ml |                    |         |
|-----------------|-------------|--------------------|---------|--------------|----------------------|---------|---------------|--------------------|---------|-------------|--------------------|---------|
|                 | rho         | 95% CI             | p-value | rho          | 95% CI               | p-value | rho           | 95% CI             | p-value | rho         | 95% CI             | p-value |
| Ferritin, ug/L  | -0.0183     | -0.4055 to 0.3744  | 0.93    | -0.0330      | -0.4177 to 0.3618    | 0.87    | 0.346         | -0.05148 to 0.6483 | 0.078   | 0.163       | -0.2425 to 0.5200  | 0.42    |
| CRP, mg/L       | -0.483      | -0.7388 to -0.1058 | 0.012   | -0.402       | -0.6896 to -0.005577 | 0.041   | 0.0742        | -0.3332 to 0.4582  | 0.72    | -0.331      | -0.6440 to 0.07635 | 0.098   |
| IL-6, pg/ml     | -0.0223     | -0.4240 to 0.3867  | 0.92    | 0.0808       | -0.3357 to 0.4709    | 0.70    | 0.287         | -0.1342 to 0.6203  | 0.16    | 0.0992      | -0.3191 to 0.4852  | 0.64    |
